# Supplementary material
Source: PubMed Central journal article supplement (PMC3385989)
Supplement: supp_2.7.831_002675SI.pdf [file supp_2.7.831_002675SI.pdf]

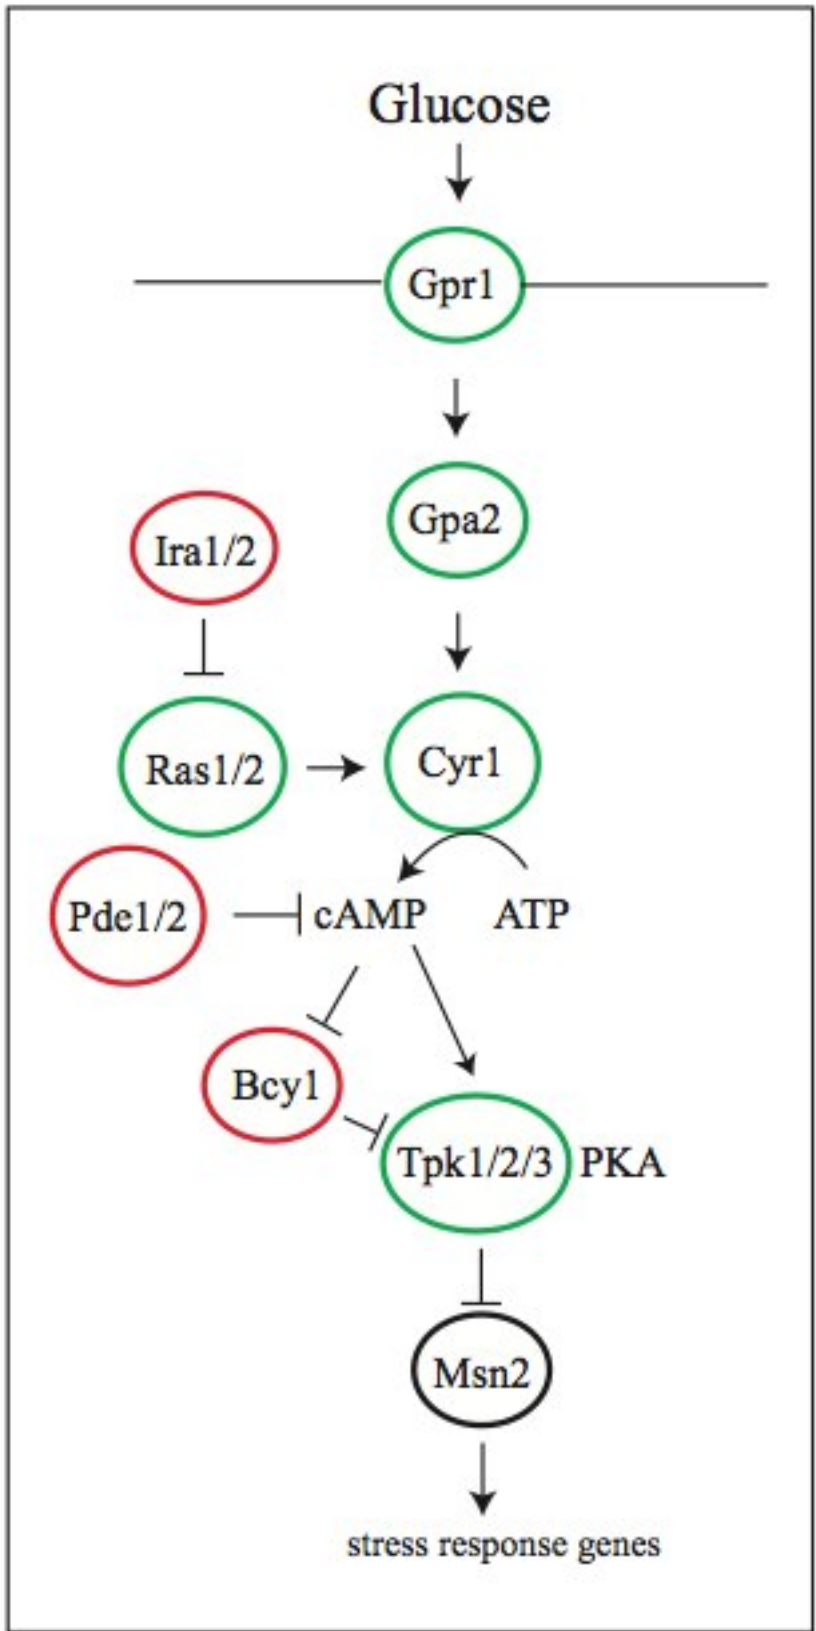

**Figure S1** Diagram of the cAMP-PKA pathway in yeast. Proteins in green circles are activators of the PKA pathway whereas proteins in red circles are inhibitors. The Msn2 transcription factor activates stress response genes when the PKA pathway is inhibited.

**Table S1 List of Yeast Strains.**

All strains are isogenic to YPH499 unless otherwise indicated.

| Strain     | Genotype                                                             | Reference                      |
|------------|----------------------------------------------------------------------|--------------------------------|
| YPH499     | MATa <i>ura3-52, lys2-801, ade2-101, his3Δ200, leu2Δ1, trp1Δ63</i>   | P. Hieter                      |
| YVM1370    | MATa <i>SPC24::kanMX6</i>                                            | (MONTPETIT <i>et al.</i> 2005) |
| YVM1448    | MATa <i>spc24-8::kanMX6</i>                                          | (MONTPETIT <i>et al.</i> 2005) |
| YVM1380    | MATa <i>spc24-9::kanMX6</i>                                          | (MONTPETIT <i>et al.</i> 2005) |
| YVM1363    | MATa <i>spc24-10::kanMX6</i>                                         | (MONTPETIT <i>et al.</i> 2005) |
| YLM1572    | MATa <i>ras2Δ::LEU2</i>                                              | (Ho and BRETSCHER 2001)        |
| YLM1813    | MATa <i>ras2Δ::LEU2 spc24-8::kanMX6</i>                              | This study                     |
| YLM1568    | MATa <i>ras2Δ::LEU2 spc24-9::kanMX6</i>                              | This study                     |
| YLM1815    | MATa <i>ras2Δ::LEU2 spc24-10::kanMX6</i>                             | This study                     |
| YM81       | MATa <i>mad2Δ::HIS3</i>                                              | P. Hieter                      |
| YVM1515    | MATa <i>mad2Δ::HIS3 spc24-8::kanMX6</i>                              | This study                     |
| YLM1985    | MATa <i>ras2Δ::LEU2 mad2Δ::HIS3</i>                                  | This study                     |
| YLM1983    | MATa <i>ras2Δ::LEU2 mad2Δ::HIS3 spc24-8::kanMX6</i>                  | This study                     |
| YM2241     | MATa <i>ndc10ΔHIS3 ndc10-1::kanMX6 CFIII TRP1</i>                    | This study                     |
| YM2268     | MATa <i>ndc10ΔHIS3 ndc10-1::kanMX6 ras2Δ::LEU2</i>                   | This study                     |
| YBL69-4-6d | MATa <i>ipl1-321 trp1Δ63 ade2 leu2 his3Δ200</i>                      | B. Lavoie                      |
| YM2273     | MATa <i>ipl1-321 ras2Δ::LEU2</i>                                     | This study                     |
| YVM64      | MATa <i>ade2-1, can1-100, his3-11,15, leu2-3,112, trp1-1 ura3-1</i>  | D. Stillman                    |
| PWY754     | MATa <i>ade2-1, can1-100, his3-11,15, leu2-3,112, trp1-1 spc25-1</i> | (WIGGE and KILMARTIN 2001)     |
| YKH628     | MATa <i>ade2-1, can1-100, his3-11,15, leu2-3,112, trp1-1 ndc80-1</i> | (WIGGE and KILMARTIN 2001)     |
| PSY455     | MATa <i>ura3-52 leu2-3,11 trp1-Δ1 nuf2-61</i>                        | (OSBORNE <i>et al.</i> 1994)   |

#### LITERATURE CITED

- HO, J., and A. BRETSCHER, 2001 Ras regulates the polarity of the yeast actin cytoskeleton through the stress response pathway. *Mol Biol Cell* **12**: 1541-1555.
- MONTPETIT, B., K. THORNE, I. BARRETT, K. ANDREWS, R. JADUSINGH *et al.*, 2005 Genome-wide synthetic lethal screens identify an interaction between the nuclear envelope protein, Apq12p, and the kinetochore in *Saccharomyces cerevisiae*. *Genetics* **171**: 489-501.
- OSBORNE, M. A., G. SCHLENSTEDT, T. JINKS and P. A. SILVER, 1994 Nuf2, a spindle pole body-associated protein required for nuclear division in yeast. *J Cell Biol* **125**: 853-866.
- WIGGE, P. A., and J. V. KILMARTIN, 2001 The Ndc80p complex from *Saccharomyces cerevisiae* contains conserved centromere components and has a function in chromosome segregation. *J Cell Biol* **152**: 349-360.
