# Supplementary material
Source: PubMed Central journal article supplement (PMC3385989)
Supplement: supp_2.7.831_FigureS1.pdf [file supp_2.7.831_FigureS1.pdf]

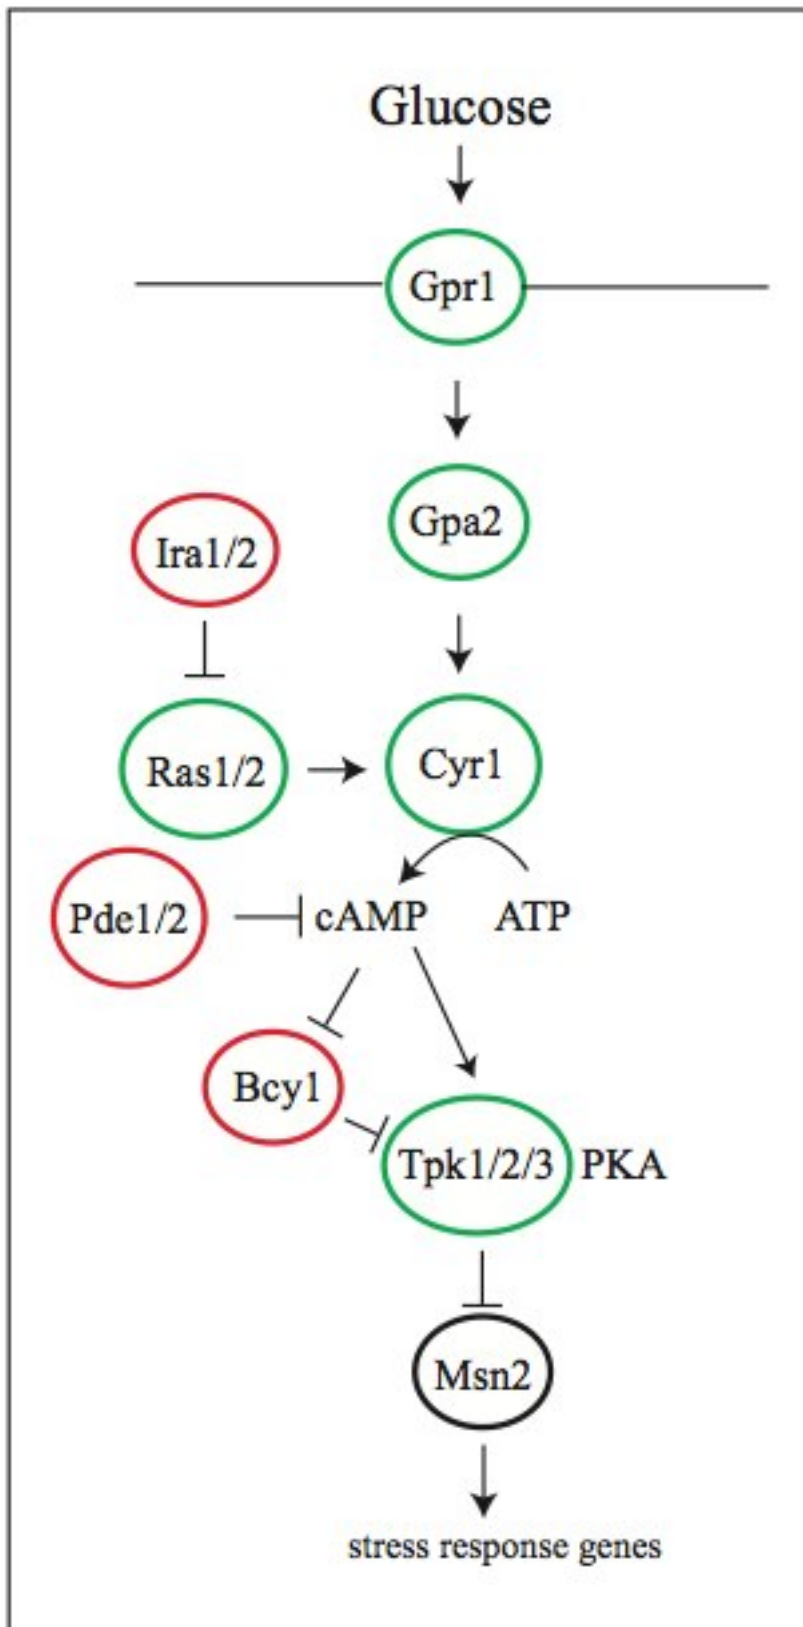

**Figure S1** Diagram of the cAMP-PKA pathway in yeast. Proteins in green circles are activators of the PKA pathway whereas proteins in red circles are inhibitors. The Msn2 transcription factor activates stress response genes when the PKA pathway is inhibited.
