# Supplementary material
Source: PubMed Central journal article supplement (PMC3385989)
Supplement: supp_2.7.831_TableS1.pdf [file supp_2.7.831_TableS1.pdf]

**Table S1 List of Yeast Strains.**

All strains are isogenic to YPH499 unless otherwise indicated.

| Strain     | Genotype                                                             | Reference                      |
|------------|----------------------------------------------------------------------|--------------------------------|
| YPH499     | MATa <i>ura3-52, lys2-801, ade2-101, his3Δ200, leu2Δ1, trp1Δ63</i>   | P. Hieter                      |
| YVM1370    | MATa <i>SPC24::kanMX6</i>                                            | (MONTPETIT <i>et al.</i> 2005) |
| YVM1448    | MATa <i>spc24-8::kanMX6</i>                                          | (MONTPETIT <i>et al.</i> 2005) |
| YVM1380    | MATa <i>spc24-9::kanMX6</i>                                          | (MONTPETIT <i>et al.</i> 2005) |
| YVM1363    | MATa <i>spc24-10::kanMX6</i>                                         | (MONTPETIT <i>et al.</i> 2005) |
| YLM1572    | MATa <i>ras2Δ::LEU2</i>                                              | (Ho and BRETSCHER 2001)        |
| YLM1813    | MATa <i>ras2Δ::LEU2 spc24-8::kanMX6</i>                              | This study                     |
| YLM1568    | MATa <i>ras2Δ::LEU2 spc24-9::kanMX6</i>                              | This study                     |
| YLM1815    | MATa <i>ras2Δ::LEU2 spc24-10::kanMX6</i>                             | This study                     |
| YM81       | MATa <i>mad2Δ::HIS3</i>                                              | P. Hieter                      |
| YVM1515    | MATa <i>mad2Δ::HIS3 spc24-8::kanMX6</i>                              | This study                     |
| YLM1985    | MATa <i>ras2Δ::LEU2 mad2Δ::HIS3</i>                                  | This study                     |
| YLM1983    | MATa <i>ras2Δ::LEU2 mad2Δ::HIS3 spc24-8::kanMX6</i>                  | This study                     |
| YM2241     | MATa <i>ndc10ΔHIS3 ndc10-1::kanMX6 CFIII TRP1</i>                    | This study                     |
| YM2268     | MATa <i>ndc10ΔHIS3 ndc10-1::kanMX6 ras2Δ::LEU2</i>                   | This study                     |
| YBL69-4-6d | MATa <i>ipl1-321 trp1Δ63 ade2 leu2 his3Δ200</i>                      | B. Lavoie                      |
| YM2273     | MATa <i>ipl1-321 ras2Δ::LEU2</i>                                     | This study                     |
| YVM64      | MATa <i>ade2-1, can1-100, his3-11,15, leu2-3,112, trp1-1 ura3-1</i>  | D. Stillman                    |
| PWY754     | MATa <i>ade2-1, can1-100, his3-11,15, leu2-3,112, trp1-1 spc25-1</i> | (WIGGE and KILMARTIN 2001)     |
| YKH628     | MATa <i>ade2-1, can1-100, his3-11,15, leu2-3,112, trp1-1 ndc80-1</i> | (WIGGE and KILMARTIN 2001)     |
| PSY455     | MATa <i>ura3-52 leu2-3,11 trp1-Δ1 nuf2-61</i>                        | (OSBORNE <i>et al.</i> 1994)   |

#### LITERATURE CITED

- HO, J., and A. BRETSCHER, 2001 Ras regulates the polarity of the yeast actin cytoskeleton through the stress response pathway. *Mol Biol Cell* **12**: 1541-1555.
- MONTPETIT, B., K. THORNE, I. BARRETT, K. ANDREWS, R. JADUSINGH *et al.*, 2005 Genome-wide synthetic lethal screens identify an interaction between the nuclear envelope protein, Apq12p, and the kinetochore in *Saccharomyces cerevisiae*. *Genetics* **171**: 489-501.
- OSBORNE, M. A., G. SCHLENSTEDT, T. JINKS and P. A. SILVER, 1994 Nuf2, a spindle pole body-associated protein required for nuclear division in yeast. *J Cell Biol* **125**: 853-866.
- WIGGE, P. A., and J. V. KILMARTIN, 2001 The Ndc80p complex from *Saccharomyces cerevisiae* contains conserved centromere components and has a function in chromosome segregation. *J Cell Biol* **152**: 349-360.
